# Supplementary material
Source: PubMed Central journal article supplement (PMC138633)
Supplement: mbc_13_12_4279__8.pdf [file mbc_13_12_4279__8.pdf]

## SUPPLEMENTAL TABLES

**Table S1. List of Antibodies used.**

| <b>Protein</b>                         | <b>Antibody Name</b> | <b>Clone</b> | <b>Source</b>                                |
|----------------------------------------|----------------------|--------------|----------------------------------------------|
| Osteocalcin                            | $\alpha$ OC PAb      | OCG2         | TaKaRa Shizuo<br>(Japan)                     |
| Osteopontin                            | $\alpha$ OP PAb      | LF123        | Dr. Larry Fisher<br>(NIH)                    |
| Osteonectin                            | $\alpha$ ON PAb      | LF37         | Dr. Larry Fisher<br>(NIH)                    |
| Biglycan                               | $\alpha$ BG PAb      | LF51         | Dr. Larry Fisher<br>(NIH)                    |
| Decorin                                | $\alpha$ DEC PAb     | LF136        | Dr. Larry Fisher<br>(NIH)                    |
| Alkaline phosphatase                   | $\alpha$ AP PAb      | LF47         | Dr. Larry Fisher<br>(NIH)                    |
| Leptin                                 | $\alpha$ LEP         | A-20         | Santa Cruz Biotechnology<br>(Santa Cruz, CA) |
| GLUT4                                  | $\alpha$ G4          | H-61         | Santa Cruz Biotechnology<br>(Santa Cruz, CA) |
| Microtubule associated<br>protein-2    | $\alpha$ MAP MAb     | AP20         | Leinco Technologies<br>(St. Louis, MO)       |
| Neurofilament 70 KDa                   | $\alpha$ NF MAb      | 8A1          | Leinco Technologies<br>(St. Louis, MO)       |
| Tau                                    | $\alpha$ TAU MAb     | TAU-2        | Leinco Technologies<br>(St. Louis, MO)       |
| Trk-a (NGF receptor)                   | $\alpha$ TRK MAb     | 763          | Santa Cruz Biotechnology<br>(Santa Cruz, CA) |
| Neuronal Nuclei                        | $\alpha$ NeuN MAb    |              | Santa Cruz Biotechnology<br>(Santa Cruz, CA) |
| Glial fibrillary protein               | $\alpha$ GFAP PAb    | 6F2          | DAKO<br>(Carpinteria, CA)                    |
| Cytosolic heat shock<br>protein 70 kDa | $\alpha$ HSC PAb     |              | Stressgen<br>(Victoria, BC)                  |
| Myosin Heavy Chain                     | $\alpha$ MYS         | my-32        | Biomed<br>(Foster City, CA)                  |
| Collagen type II                       | $\alpha$ CNII MAb    | II-4CII      | ICN<br>(Aurora, OH)                          |
| Keratan sulfate                        | $\alpha$ KS MAb      | 5-D-4        | ICN<br>(Aurora, OH)                          |
| Chondroitin-4-sulfate                  | $\alpha$ CS MAb      |              | ICN<br>(Aurora, OH)                          |
| Cluster designation<br>antigens        | $\alpha$ CD MAb's    |              | BD Pharmingen<br>(San Diego, CA)             |
| PECAM-1                                | $\alpha$ CD31        | 9G11         | R&D Systems<br>(Minneapolis, MN)             |
| Transferrin receptor<br>(CD71)         | $\alpha$ CD71 MAb    | H68.4        | Zymed<br>(South San Francisco, CA)           |

MAb – monoclonal antibody

PAb – polyclonal antibody

**Table S2. Oligonucleotide primer sequences and expected PCR product sizes**

| Lineage                   | Gene                                      | Oligonucleotide primers                                   | Product size                                         |        |
|---------------------------|-------------------------------------------|-----------------------------------------------------------|------------------------------------------------------|--------|
| BONE                      | Osteonectin (ON)                          | 5' TGTGGGAGCTAATCCTGTCC<br>3' T CAGGACGTTCTTGAGCCAGT      | 400 bp                                               |        |
|                           | Osteopontin (OP)                          | 5' GCTCTAGAATGAGAATTGCACTG<br>3' GTC AATGGAGTCCTGGCTGT    | 270 bp                                               |        |
|                           | Osteocalcin (OC)                          | 5' GCTCTAGAATGGCCCTCACACTC<br>3' GCGATATCCTAGACCGGGCCGTAG | 302 bp                                               |        |
|                           | Core binding factor $\alpha$ -1 (CBFA-1)  | 5' CTCCTACTACCACCTACCTG<br>3' TCAATATGGTCGCCAAACAGATTC    | 320 bp                                               |        |
|                           | Collagen I (CNI) ( $\alpha$ 1 chain)      | 5' GAGAGAGAGGCTTCCCTGGT<br>3' CACCAGGATCACCCTCTTG         | 300 bp                                               |        |
|                           | Alkaline phosphatase (AP)                 | 5' TGAATATGCCCTGGAGC<br>3' TCACGTTGTTCTGTTTAG             | 475 bp                                               |        |
|                           | Retinoid X Receptor alpha (RXR $\alpha$ ) | 5' ACATGGCTTCTTACCAAG<br>3' CAGCTCAGCCTCCAGGATCC          | 300 bp                                               |        |
|                           | Vitamin D Receptor (VDR)                  | 5' CTCGTCAGCTTCTCCAATC<br>3' GCTCCTCCTCATGCAAGTTC         | 400 bp                                               |        |
|                           | c-fos                                     | 5' CCTGTCAAGAGCATCAGCAG<br>3' GTCAGAGGAAGGCTCATTGC        | 348 bp                                               |        |
|                           | msx2                                      | 5' TTACCACATCCCAGCTCCTC<br>3' GCATAGGTTTTGCAGCCATT        | 201 bp                                               |        |
|                           | distal-less 5 (dlx5)                      | 5' TTGCCCGAGTCTTCCAGCTAC<br>3' TCTTTCTCTGGCTGTTGGT        | 254 bp                                               |        |
|                           | Bone morphogenic protein (BMP2)           | 5' AGACCTGTATCGCAGGCACT<br>3' CCAACTGGGTGCCAAAAGT         | 350 bp                                               |        |
|                           | Parathyroid Hormone Receptor 1 (PTHr)     | 5' ACCGTAGCTGTGCTCATCCT<br>3' CCCTCCACCAGAATCCAGTA        | 300 bp                                               |        |
|                           | FAT                                       | aP2                                                       | 5' TGGTTGATTTCCATCCCAT<br>3' TACTGGGCCAGGAATTTGAT    | 150 bp |
|                           |                                           | LPL                                                       | 5' GAGATTTCTCTGTATGGCACC<br>3' CTGCAAATGAGACACTTTCTC | 276 bp |
| PPAR gamma1 ( $\gamma$ 1) |                                           | 5' GCTCTAGAATGACCATGGTTGAC<br>3' ATAAGGTGGAGATGCAGGCTC    | 250 bp                                               |        |
| Leptin                    |                                           | 5' GGCTTTGGCCCTATCTTTTC<br>3' GCTCTTAGAGAAGGCCAGCA        | 325 bp                                               |        |
| GLUT4                     |                                           | 5' AGCAGCTCTCTGGCATCAAT<br>3' CAATGGAGACGTAGCACATG        | 275 bp                                               |        |
| PPAR gamma2 ( $\gamma$ 2) |                                           | 5' GCTGTTATGGGTGAAACTCTG<br>3' ATAAGGTGGAGATGCAGGTTTC     | 325 bp                                               |        |
| CARTILAGE                 |                                           | Collagen II ( $\alpha$ 1 chain)                           | 5' ATGATTCGCCTCGGGGCTCC<br>3' TCCCAGGTTCTCCATCTCTG   | 260 bp |
|                           | Aggrecan                                  | 5' GCAGAGACGCATCTAGAAATT<br>3' GGTAATTGCAGGGAACATCAT      | 505 bp                                               |        |
|                           | Decorin                                   | 5' CCTTTGGTGAAGTTGGAACG<br>3' AAGATGTAATCCGTAAGGG         | 300 bp                                               |        |
|                           | Biglycan                                  | 5' TGCAGAACAAACGACATCTCC<br>3' AGCTTGGAGTAGCGAAGCAG       | 475 bp                                               |        |
|                           | Collagen X                                | 5' TGGAGTGGGAAAAGAGGTG<br>3' GTCCTCCAATCCAGGATCA          | 600 bp                                               |        |
| MUSCLE                    | MyoD1 (MD1)                               | 5' AAGCGCCATCTCTTGGAGTA<br>3' GCGCCTTTATTTTGATCACC        | 500 bp                                               |        |
|                           | Myf5                                      | 5' CCACCTCCAATGCTCTGAT<br>3' GGAGTTCGAGGCTGTGAATC         | 250 bp                                               |        |
|                           | Myogenin (MG0)                            | 5' TGGGCGTGTAAAGTGTGTAA<br>3' TTGAGCAGGGTGCTTCTCTT        | 130 bp                                               |        |
|                           | Myosin (MYS)                              | 5' TGTGAATGCCAAATGTGCTT<br>3' GTGGAGCTGGGTATCCTTGA        | 750 bp                                               |        |
|                           | Myf6                                      | 5' AGAGAAAATCTGCCCCCACT<br>3' GATGGAAGAAAGGCATCGAA        | 410 bp                                               |        |
|                           | Desmin                                    | 5' GGTGGAGGTGCTCACTAACC<br>3' TGTTGTCCTGGTAGCCACTG        | 600 bp                                               |        |
| NERVE                     | Glial Fibrillary Acidic Protein (GFAP)    | 5' AATGCTGGCTTCAAGGAGAC<br>3' CCAGCGACTCAATCTTCTCTC       | 406 bp                                               |        |
|                           | GAD65                                     | 5' TGGCGATGGGATATTTTCTC<br>3' GCACTCACGAGGAAAGGAAC        | 300 bp                                               |        |
|                           | Nestin                                    | 5' GGAGTCGTTTCAGATGTGGG<br>3' AGCTTTCAGCCAGGTTGTC         | 242 bp                                               |        |
|                           | Choline acetyltransferase (CHaT)          | 5' TACAGGCTCCACCGAAGACT<br>3' AATCCTGGTCTCTGGCCCTTC       | 376 bp                                               |        |
