# Supplementary material
Source: PubMed Central journal article supplement (PMC138633)

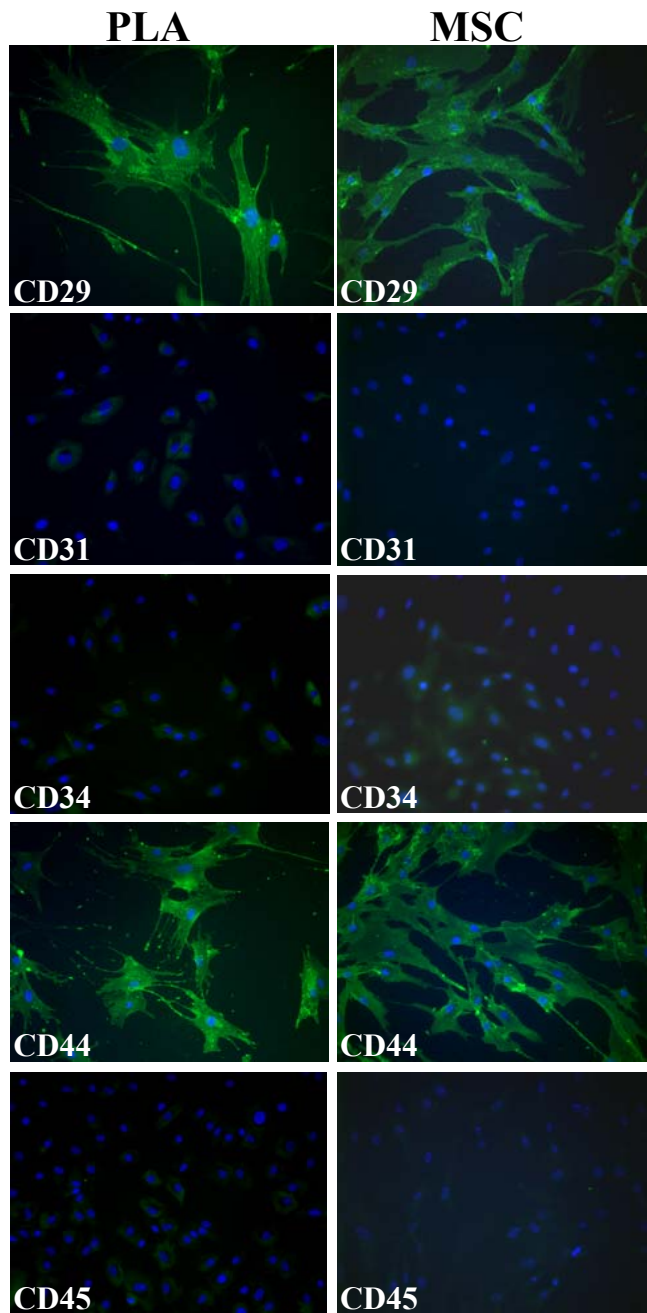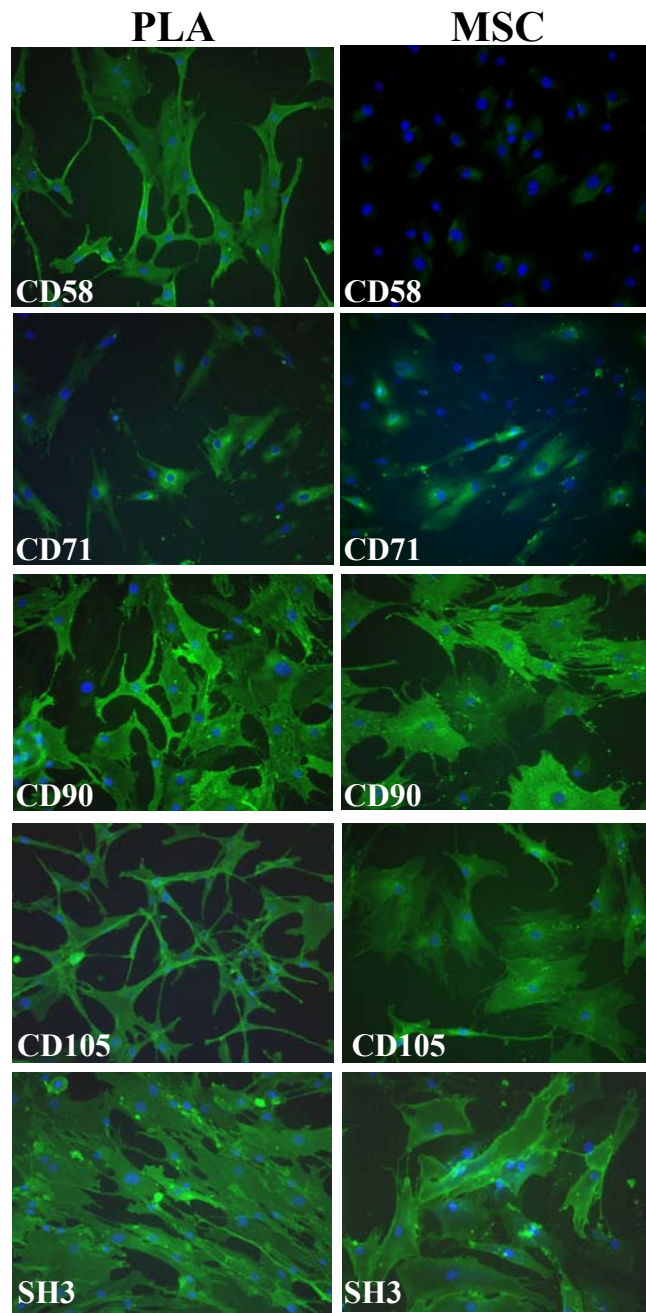

Supplement: mbc_13_12_4279__1.pdf [file mbc_13_12_4279__1.pdf]

**A.**

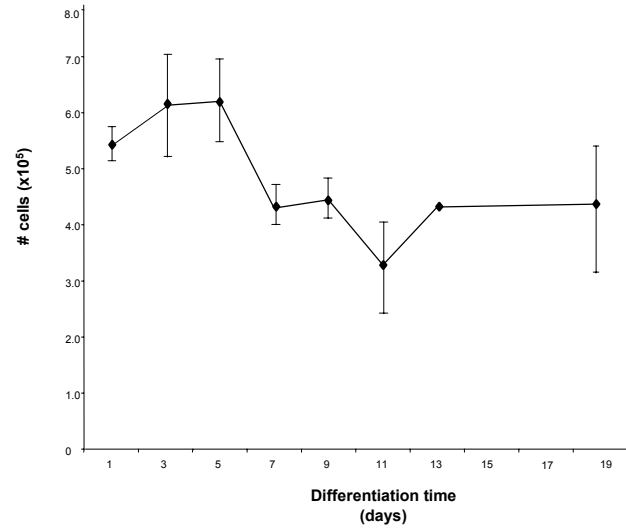

**B.**

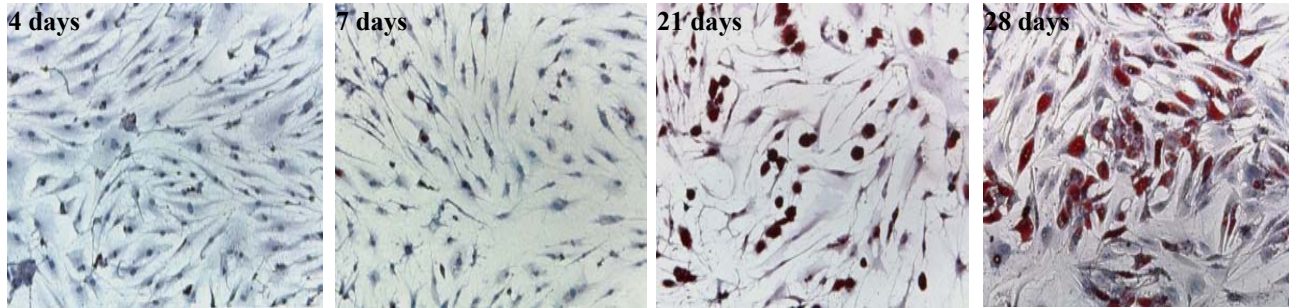

Supplement: mbc_13_12_4279__2.pdf [file mbc_13_12_4279__2.pdf]

**A.**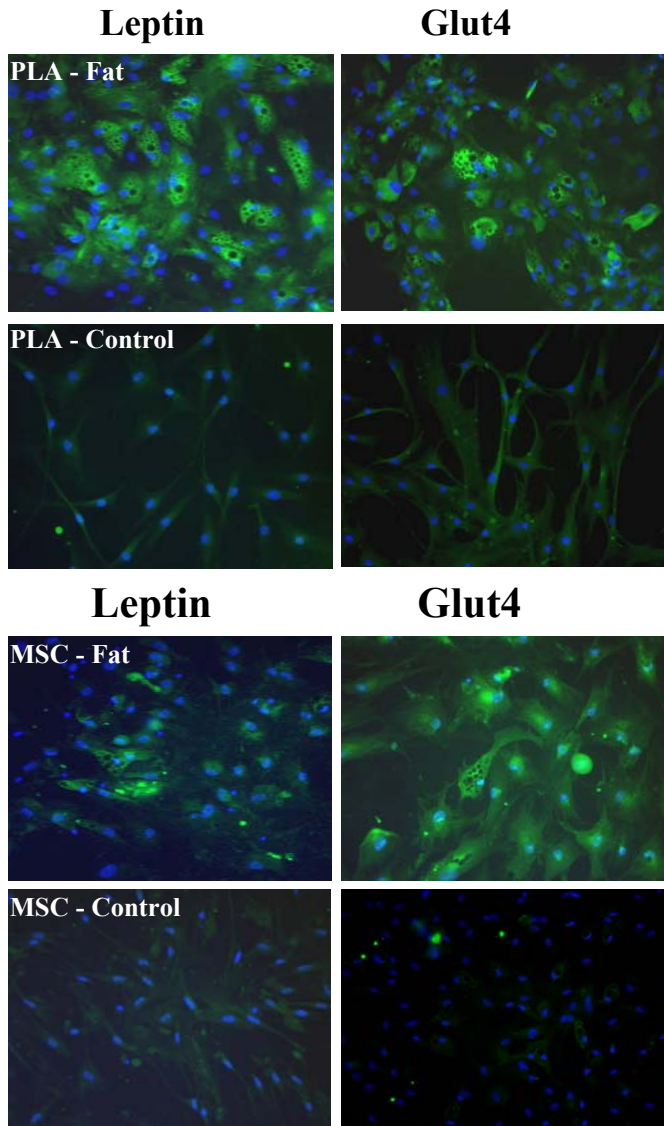**B.**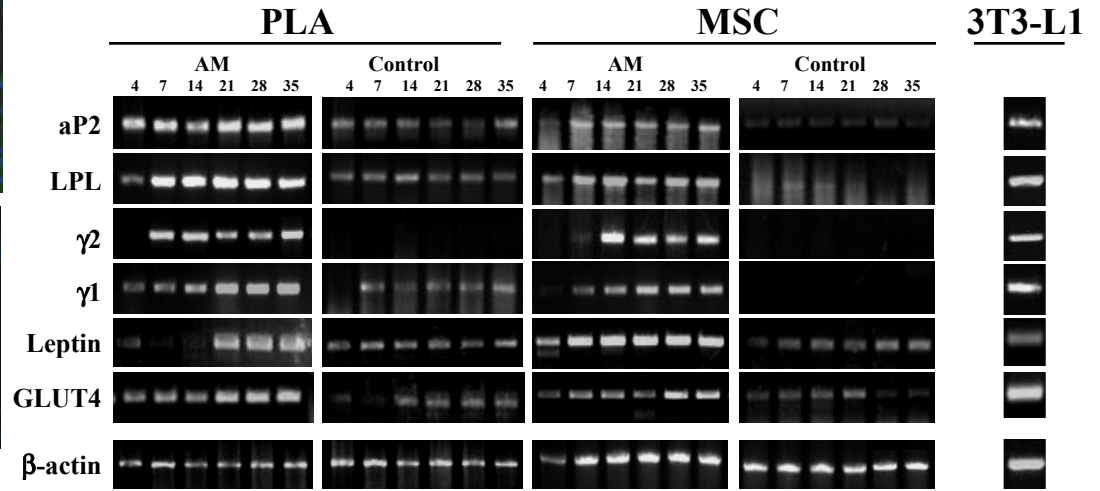

Supplement: mbc_13_12_4279__3.pdf [file mbc_13_12_4279__3.pdf]

**A.**

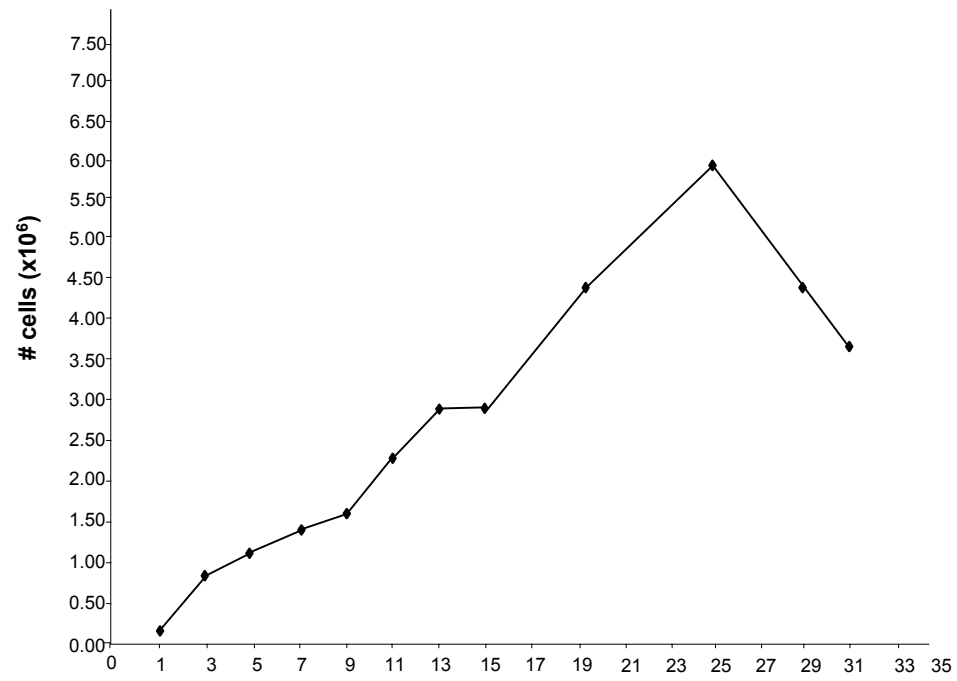

**B.**

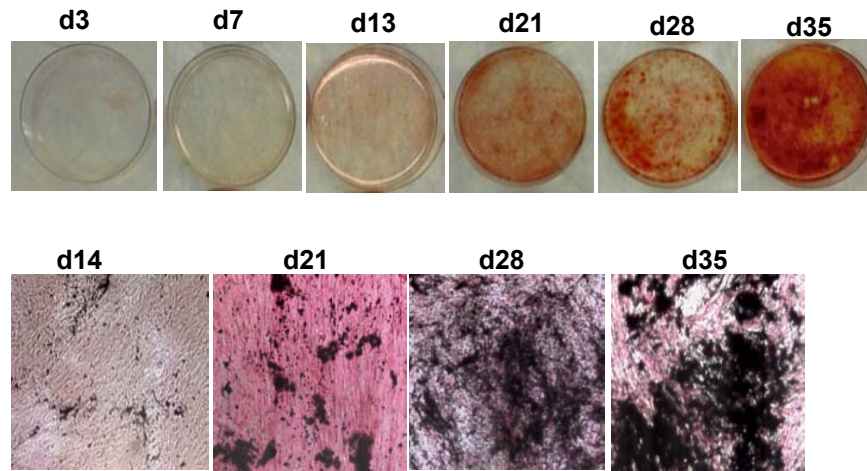

Supplement: mbc_13_12_4279__4.pdf [file mbc_13_12_4279__4.pdf]

**A.**

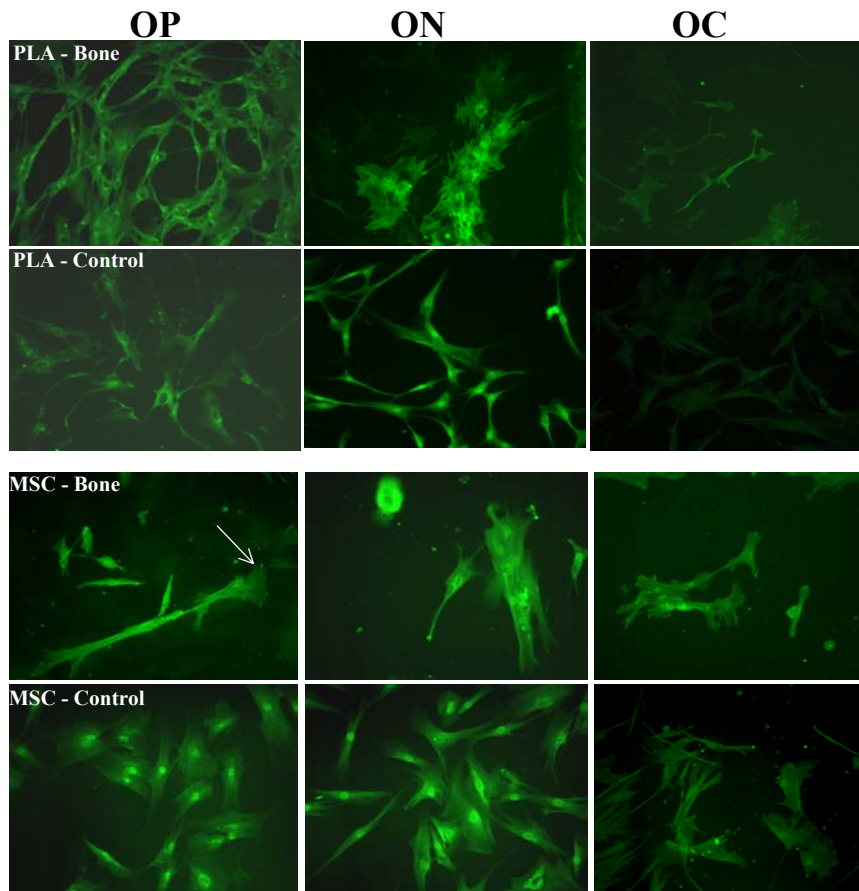

**B.**

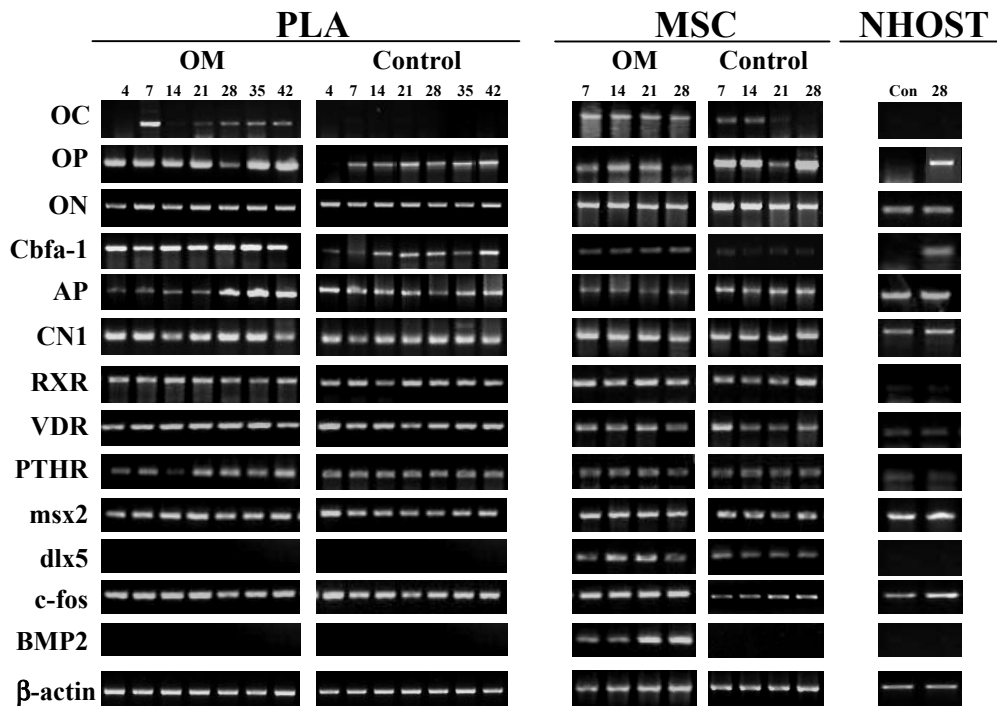

Supplement: mbc_13_12_4279__5.pdf [file mbc_13_12_4279__5.pdf]

**A.**

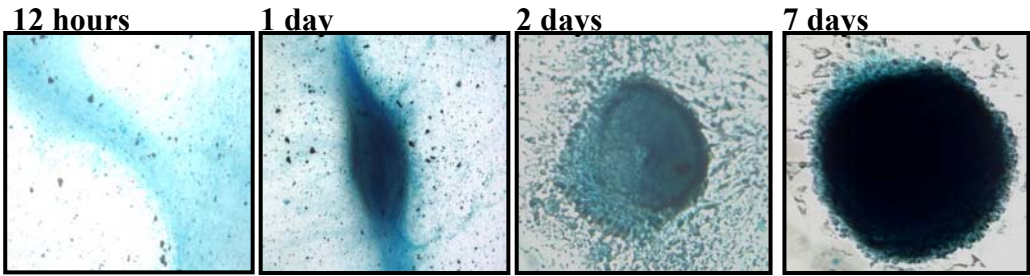

**B.**

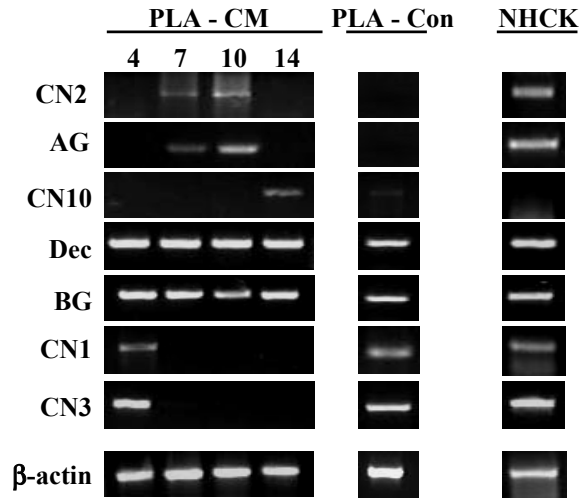

Supplement: mbc_13_12_4279__6.pdf [file mbc_13_12_4279__6.pdf]

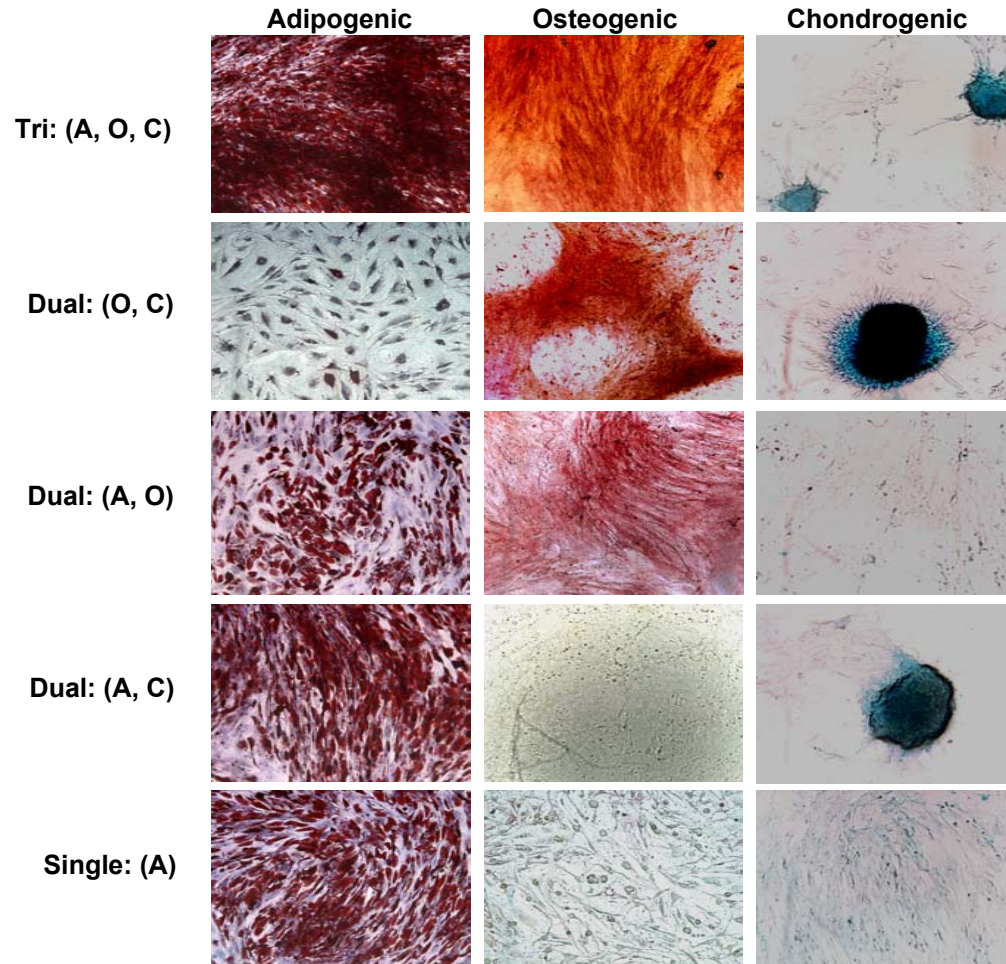

Supplement: mbc_13_12_4279__7.pdf [file mbc_13_12_4279__7.pdf]
